# Supplementary material for: Baseline Characteristics of Canadian Patients in the Psoriasis Longitudinal Assessment and Registry (PSOLAR)
Source: PubMed Central journal article supplement — J Cutan Med Surg. 2023 Aug 11;27(6):594–600. doi: 10.1177/12034754231191509 (PMC10714709; doi:10.1177/12034754231191509), 2023-08-11
Supplement: sj-pdf-1-cms-10.1177_12034754231191509.pdf [file sj-pdf-1-cms-10.1177_12034754231191509.pdf]

**SUPPLEMENTARY DATA for:**

***Baseline Characteristics of Canadian Patients in the Psoriasis Longitudinal Assessment and Registry (PSOLAR)***

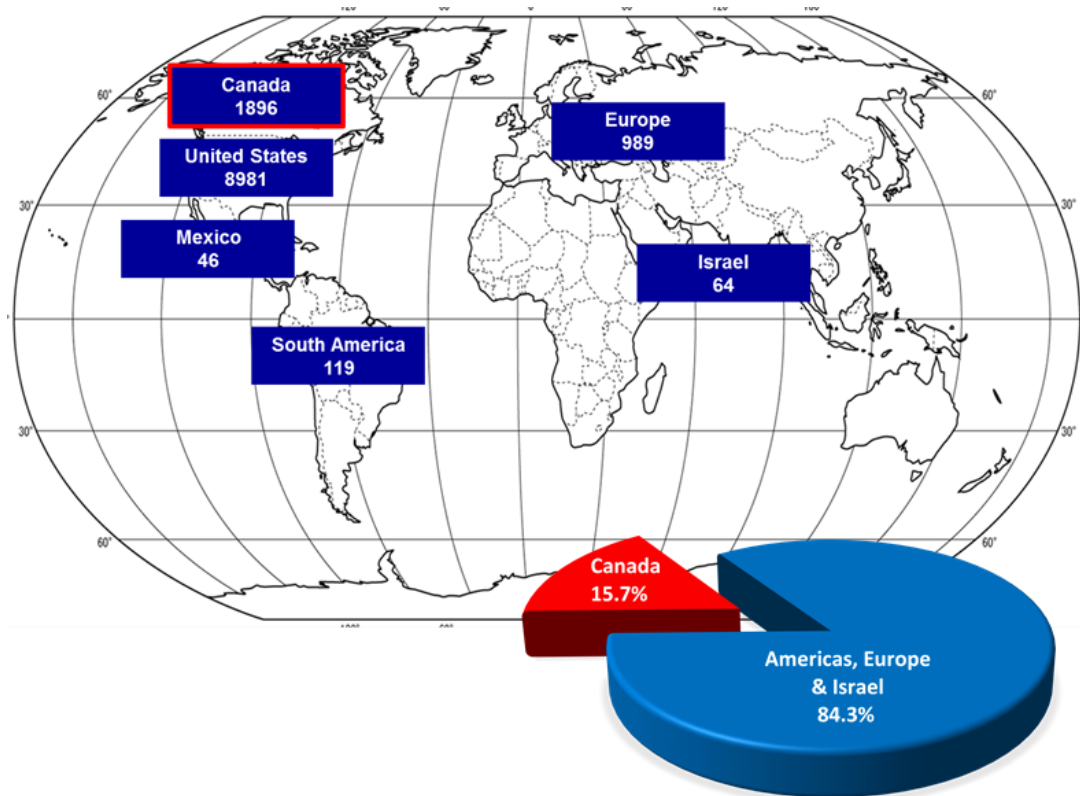

**Figure S1.** Proportion of patients enrolled in PSOLAR by country and the Canadian contribution to the registry (Aug 23, 2013).

*PSOLAR, Psoriasis Longitudinal Assessment and Registry.*

**Table S1.** Baseline demographics and disease characteristics of Canadian PSOLAR patients at enrollment.

|                                      | All patients<br>N=1896 | Female<br>N=731 | Male<br>N=1165 |
|--------------------------------------|------------------------|-----------------|----------------|
| Race, n (%)                          |                        |                 |                |
| White                                | 1739 (91.7%)           | 682 (93.3%)     | 1057 (90.7%)   |
| Black                                | 11 (0.6)               | 3 (0.4%)        | 8 (0.7%)       |
| Asian                                | 73 (3.9)               | 21 (2.9%)       | 52 (4.5%)      |
| Hispanic or Latino                   | 7 (0.4%)               | 3 (0.4%)        | 4 (0.3%)       |
| Other                                | 66 (3.5%)              | 22 (3.0%)       | 44 (3.8%)      |
| Age (y), Mean (SD)                   | 49.0 (12.6)            | 49.0 (13.0)     | 49.0 (12.3)    |
| Psoriasis type, n (%)                |                        |                 |                |
| Plaque                               | 1881 (99.2%)           | 720 (98.5%)     | 1161 (99.7%)   |
| Guttate                              | 13 (0.7%)              | 10 (1.4%)       | 3 (0.3%)       |
| Erythrodermic                        | 3 (0.2%)               | 2 (0.3%)        | 1 (0.1%)       |
| Pustular                             | 18 (0.9%)              | 14 (1.9%)       | 4 (0.3%)       |
| Inverse                              | 4 (0.2%)               | 2 (0.3%)        | 2 (0.2%)       |
| Duration of psoriasis (y), Mean (SD) | 22.3 (12.82)           | 23.1 (13.94)    | 21.7 (12.7)    |
| BSA by palm method (%), Mean (SD)    | 7.4 (11.9)             | 6.9 (11.4)      | 7.8 (12.2)     |
| <b>Patients with PGA data, n</b>     | <b>1830</b>            | <b>703</b>      | <b>1127</b>    |
| PGA score, Mean (SD)                 | 1.9 (1.2)              | 1.9 (1.1)       | 2.0 (1.3)      |
| PGA score distribution, n (%)        |                        |                 |                |
| 0 - clear                            | 291 (15.9%)            | 108 (15.4%)     | 183 (16.2%)    |
| 1 - minimal                          | 366 (20.0%)            | 147 (20.9%)     | 219 (19.4%)    |
| 2 - mild                             | 532 (29.1%)            | 218 (31.0%)     | 314 (27.9%)    |
| 3 - moderate                         | 490 (26.8%)            | 192 (27.3%)     | 298 (26.4%)    |
| 4 - marked                           | 140 (7.7%)             | 37 (5.3%)       | 103 (9.1%)     |
| 5 - severe                           | 11 (0.6%)              | 1 (0.1%)        | 10 (0.9%)      |
| <b>Patients with obesity data, n</b> | <b>1881</b>            | <b>724</b>      | <b>1157</b>    |
| BMI (kg/m <sup>2</sup> ), Mean (SD)  | 31.335 (6.8)           | 31.568 (7.6)    | 31.189 (6.3)   |
| Obesity class, n (%)                 |                        |                 |                |
| Underweight (BMI < 18.5)             | 5 (0.3%)               | 4 (0.6%)        | 1 (0.1%)       |
| Normal (18.5-24.9)                   | 282 (15.0%)            | 135 (18.6%)     | 147 (12.7%)    |
| Overweight (25.0-29.9)               | 632 (33.6%)            | 211 (29.1%)     | 421 (36.4%)    |
| Obesity class I (30.0-34.9)          | 488 (25.9%)            | 156 (21.5%)     | 332 (28.7%)    |
| Obesity class II (35.0-39.9)         | 269 (14.3%)            | 118 (16.3%)     | 151 (13.1%)    |
| Obesity class III (40.0 +)           | 205 (10.9%)            | 100 (13.9%)     | 151 (13.1%)    |

*BMI, body mass index; BSA, body surface area; PASI, Psoriasis Area and Severity Index; PGA, Physician Global Assessment; PSOLAR, Psoriasis Longitudinal Assessment and Registry; SD, standard deviation; y, years.*

**Table S2.** Medical and social history of Canadian PSOLAR patients at enrollment.

|                                   | All Patients<br>N=1896 | Female<br>N=731 | Male<br>N=1165 |
|-----------------------------------|------------------------|-----------------|----------------|
| Psoriatic arthritis, n (%)        | 597 (31.5%)            | 233 (31.9%)     | 364 (31.2%)    |
| Physician confirmed               | 339 (17.9%)            | 124 (17.0%)     | 210 (18.0%)    |
| Cardiovascular disease, n (%)     | 830 (43.8%)            | 313 (42.8%)     | 517 (44.4%)    |
| Hypertension                      | 656 (34.6%)            | 246 (33.7%)     | 410 (35.2%)    |
| Hyperlipidemia                    | 460 (24.3%)            | 174 (23.8%)     | 286 (24.5%)    |
| Atherosclerotic disease           | 83 (4.4%)              | 20 (2.7%)       | 63 (5.4%)      |
| Coronary artery disease           | 65 (3.4%)              | 14 (1.9%)       | 51 (4.4%)      |
| Myocardial infarction             | 55 (2.9%)              | 8 (1.1%)        | 47 (4.0%)      |
| TIA/CVA/stroke                    | 36 (1.9%)              | 13 (1.8%)       | 23 (2.0%)      |
| Angina                            | 48 (2.5%)              | 18 (2.5%)       | 30 (2.6%)      |
| Peripheral arterial disease       | 16 (0.8%)              | 7 (1.0%)        | 9 (0.8%)       |
| Congestive heart failure          | 12 (0.6%)              | 3 (0.4%)        | 9 (0.8%)       |
| Diabetes mellitus type II, n (%)  | 250 (13.2%)            | 91 (12.4%)      | 159 (13.6%)    |
| Mental illness, n (%)             | 456 (24.1%)            | 240 (32.8%)     | 216 (18.5%)    |
| Depression                        | 329 (17.4%)            | 180 (24.6%)     | 149 (12.8%)    |
| Anxiety                           | 217 (11.4%)            | 117 (16.0%)     | 100 (8.6%)     |
| Bipolar                           | 24 (1.3%)              | 11 (1.5%)       | 13 (1.1%)      |
| Suicidal ideation                 | 14 (0.7%)              | 7 (1.0%)        | 7 (0.6%)       |
| Schizophrenia                     | 5 (0.3%)               | 2 (0.3%)        | 3 (0.3%)       |
| Inflammatory bowel disease, n (%) | 31 (1.6%)              | 15 (2.1%)       | 16 (1.4%)      |
| Crohn's disease                   | 13 (0.7%)              | 6 (0.8%)        | 7 (0.6%)       |
| Indeterminate colitis             | 11 (0.6%)              | 6 (0.8%)        | 5 (0.4%)       |
| Ulcerative colitis                | 8 (0.4%)               | 3 (0.4%)        | 5 (0.4%)       |
| Malignancy, n (%)                 |                        |                 |                |
| Skin cancer                       | 61 (3.2%)              | 25 (3.4%)       | 36 (3.1%)      |
| Melanoma                          | 12 (0.6%)              | 6 (0.8%)        | 6 (0.5%)       |
| Other                             | 58 (3.1%)              | 33 (4.5%)       | 25 (2.1%)      |
| Pulmonary, n (%)                  |                        |                 |                |
| Sleep apnea                       | 82 (4.3%)              | 28 (3.8%)       | 54 (4.6%)      |
| COPD                              | 18 (0.9%)              | 8 (1.1%)        | 10 (0.9%)      |
| Hepatic, n (%)                    | 49 (2.6%)              | 18 (2.5%)       | 31 (2.7%)      |
| Alcohol use, n (%)                |                        |                 |                |
| Current use                       | 1568 (82.7%)           | 578 (79.1%)     | 990 (85.0%)    |
| Never used                        | 184 (9.7%)             | 109 (14.9%)     | 75 (6.4%)      |
| Have used and stopped             | 144 (7.6%)             | 44 (6.0%)       | 100 (8.6%)     |
| Smoking, n (%)                    |                        |                 |                |
| Current smoker                    | 539 (28.4%)            | 219 (30.0%)     | 320 (27.5%)    |
| Never smoked                      | 598 (31.5%)            | 243 (33.2%)     | 355 (30.5%)    |
| Prior smoker, stopped             | 759 (40.0%)            | 269 (36.8%)     | 490 (42.1%)    |

COPD, Chronic obstructive pulmonary disease; CVA, cerebrovascular accident; PSOLAR, Psoriasis Longitudinal Assessment and Registry; TIA, transient ischemic attack.

**Table S3.** Cardiovascular risk factors and conditions in Canadian PSOLAR patients at enrollment, by age group.

|                             | Age Group (years)            |                  |                  |                   |                |
|-----------------------------|------------------------------|------------------|------------------|-------------------|----------------|
|                             | 12-19 <sup>a</sup><br>(N=17) | 20-34<br>(N=252) | 35-44<br>(N=400) | 45-64<br>(N=1036) | ≥65<br>(N=191) |
| Cardiovascular, n (%)       | 0                            | 21 (8.3%)        | 101 (25.3%)      | 560 (54.1%)       | 148 (77.5%)    |
| Hypertension                | 0                            | 16 (6.3%)        | 71 (17.8%)       | 448 (43.2%)       | 121 (63.4%)    |
| Hyperlipidemia              | 0                            | 8 (3.2%)         | 52 (13.0%)       | 305 (29.4%)       | 95 (49.7%)     |
| Myocardial infarction       | 0                            | 0                | 3 (0.8%)         | 30 (2.9%)         | 22 (11.5%)     |
| Angina                      | 0                            | 0                | 1 (0.3%)         | 37 (3.6%)         | 10 (5.2%)      |
| Atherosclerotic disease     | 0                            | 0                | 1 (0.3%)         | 60 (5.8%)         | 22 (11.5%)     |
| TIA/CVA/stroke              | 0                            | 0                | 1 (0.3%)         | 22 (2.1%)         | 13 (6.8%)      |
| Coronary artery disease     | 0                            | 0                | 0                | 46 (4.4%)         | 19 (9.9%)      |
| Peripheral arterial disease | 0                            | 0                | 0                | 13 (1.3%)         | 3 (1.6%)       |
| Congestive heart failure    | 0                            | 0                | 0                | 7 (0.7%)          | 5 (2.6%)       |

<sup>a</sup> PSOLAR enrolled patients aged ≥18 years

CVA, cerebrovascular accident; PSOLAR, Psoriasis Longitudinal Assessment and Registry; TIA, transient ischemic attack.

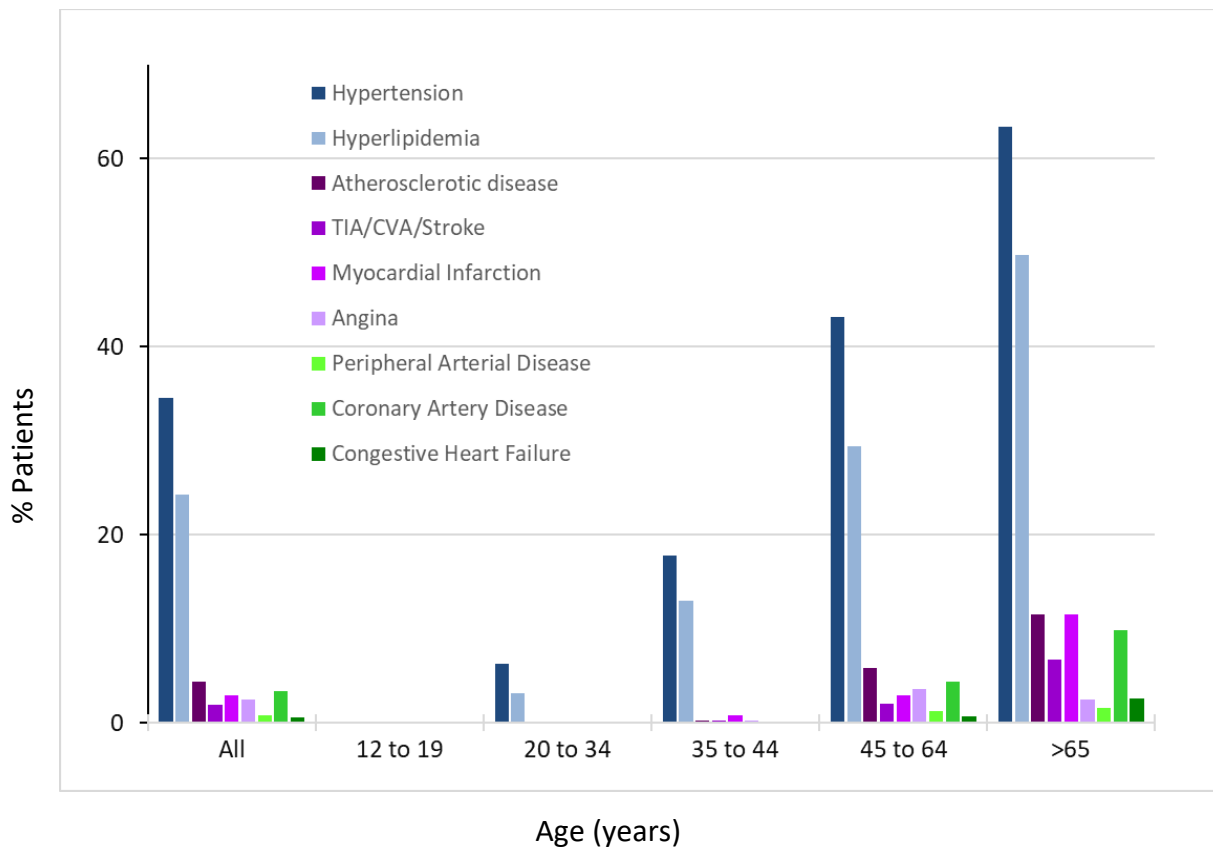

**Figure S2:** Cardiovascular risk factors and conditions of Canadian PSOLAR patients at enrollment, by age group.

*CVA, cerebrovascular accident; PSOLAR, Psoriasis Longitudinal Assessment and Registry; TIA, transient ischemic attack.*

**Table S4a.** Previous non-biologic medications used by Canadian PSOLAR patients prior to enrollment.

| Medication, n (%)                             | All patients<br>N=1896 | Female<br>N=731 | Male<br>N=1165 |
|-----------------------------------------------|------------------------|-----------------|----------------|
| <b>Medication history data, n</b>             | <b>1893</b>            | <b>729</b>      | <b>1164</b>    |
| Topical therapy                               | 1810 (95.6%)           | 700 (96.0%)     | 1110 (95.4%)   |
| Tazarotene                                    | 95 (5.0%)              | 42 (5.8%)       | 53 (4.6%)      |
| Calcipotriene and bethamethasone dipropionate | 85 (4.5%)              | 33 (4.5%)       | 52 (4.5%)      |
| Light/laser therapy                           | 1375 (72.6%)           | 552 (75.7%)     | 823 (70.7%)    |
| Psoralen + UVA                                | 433 (22.9%)            | 182 (25.0%)     | 251 (21.6%)    |
| UVB                                           | 1242 (65.6%)           | 487 (66.8%)     | 755 (64.9%)    |
| Laser                                         | 3 (0.2%)               | 2 (0.3%)        | 1 (0.1%)       |
| Systemic corticosteroids                      | 181 (9.6%)             | 80 (11.0%)      | 101 (8.7%)     |
| Systemic retinoids                            |                        |                 |                |
| Acitretin                                     | 392 (20.7%)            | 148 (20.3%)     | 244 (21.0%)    |
| Etretinate                                    | 22 (1.2%)              | 6 (0.8%)        | 16 (1.4%)      |
| Systemic immunomodulators                     | 1045 (55.2%)           | 417 (57.2%)     | 628 (54.0%)    |
| Cyclosporine                                  | 331 (17.5%)            | 133 (18.2%)     | 198 (17.0%)    |
| Methotrexate                                  | 895 (47.3%)            | 363 (49.8%)     | 532 (45.7%)    |
| Mycophenolate mofetil                         | 14 (0.7%)              | 8 (1.1%)        | 6 (0.5%)       |
| Other Immunomodulators                        | 77 (4.1%)              | 22 (3.0%)       | 55 (4.7%)      |
| <b>NSAID data, n</b>                          | <b>1895</b>            | <b>731</b>      | <b>1164</b>    |
| Systemic NSAIDs                               | 278 (14.7%)            | 108 (14.8%)     | 170 (14.6%)    |
| Sulfasalazine                                 | 24 (1.3%)              | 9 (1.2%)        | 15 (1.3%)      |
| Other NSAIDs                                  | 268 (14.1%)            | 103 (14.1%)     | 165 (14.2%)    |

NSAID, non-steroidal anti-inflammatory drug; PSOLAR, Psoriasis Longitudinal Assessment and Registry; UVA, ultraviolet A; UVB, ultraviolet B.

**Table S4b.** Previous biologic medications used by Canadian PSOLAR patients prior to enrollment.

|                                                    | All patients<br>N=1896 | Female<br>N=731 | Male<br>N=1165 |
|----------------------------------------------------|------------------------|-----------------|----------------|
| Any biologic medication                            | 1627 (85.8%)           | 621 (85.0%)     | 1006 (86.4%)   |
| History of biologic medications at entry           |                        |                 |                |
| Infliximab (Remicade)                              | 372 (19.6%)            | 144 (19.7%)     | 228 (19.6%)    |
| Ustekinumab (Stelara)                              | 943 (49.7%)            | 348 (47.6%)     | 595 (51.1%)    |
| Golimumab (Simponi)                                | 7 (0.4%)               | 5 (0.7%)        | 2 (0.2%)       |
| Adalimumab (Humira)                                | 429 (22.6%)            | 160 (21.9%)     | 269 (23.1%)    |
| Alefacept (Amevive)                                | 214 (11.3%)            | 72 (9.8%)       | 142 (12.2%)    |
| Efalizumab (Raptiva)                               | 221 (11.7%)            | 88 (12.0%)      | 133 (11.4%)    |
| Etanercept (Enbrel)                                | 541 (28.5%)            | 210 (28.7%)     | 331 (28.4%)    |
| Other                                              | 105 (5.5%)             | 36 (4.9%)       | 69 (5.9%)      |
| Number of biologic medications used prior to entry |                        |                 |                |
| 0                                                  | 269 (14.2%)            | 110 (15.0%)     | 159 (13.6%)    |
| 1                                                  | 843 (44.5%)            | 334 (45.7%)     | 509 (43.7%)    |
| 2                                                  | 474 (25.0%)            | 179 (24.5%)     | 295 (25.3%)    |
| 3                                                  | 222 (11.7%)            | 71 (9.7%)       | 151 (13.0%)    |
| 4                                                  | 67 (3.5%)              | 28 (3.8%)       | 39 (3.3%)      |
| 5                                                  | 19 (1.0%)              | 8 (1.1%)        | 11 (0.9%)      |
| 6                                                  | 2 (0.1%)               | 1 (0.1%)        | 1 (0.1%)       |

PSOLAR, *Psoriasis Longitudinal Assessment and Registry*.

**Table S5.** Key clinical characteristics differentiating the Canadian and Global PSOLAR populations.

|                                       | Canadian     | Global <sup>13</sup> |
|---------------------------------------|--------------|----------------------|
| Gender, n                             | 1896         | 11,900               |
| Male, n (%)                           | 1165 (61.4%) | 6513 (54.7%)         |
| Duration of psoriasis (y), n          | 1893         | 11777                |
| Mean (SD)                             | 22.3 (±12.8) | 17.5 (±13.5)         |
| PGA score at peak disease activity, n | 979          | 6845                 |
| PGA ≥3, n (%)                         | 926 (94.5%)  | 5457 (79.7%)         |
| PGA 3 (Moderate), n (%)               | 552 (56.4%)  | 3174 (46.4%)         |
| PGA 4 (Marked), n (%)                 | 333 (34.0%)  | 1807 (26.4%)         |
| PGA 5 (Severe), n (%)                 | 41 (4.2%)    | 476 (7.0%)           |
| Mean (SD)                             | 3.35 (0.72)  | 3.1 (1.0)            |
| BMI category, n                       | 1881         | 11703                |
| Normal (BMI 18.5-24.9), n (%)         | 282 (15%)    | 2235 (19.1%)         |
| Overweight/obese (BMI ≥25), n (%)     | 1594 (84.7%) | 9409 (80.4%)         |

*BMI, body mass index; PGA, Physician Global Assessment; PSOLAR, Psoriasis Longitudinal Assessment and Registry; SD, standard deviation; y, years.*
